# Supplementary material
Source: PubMed Central journal article supplement (PMC2711383)
Supplement: mmc1.pdf [file mmc1.pdf]

Biophysical Journal, Volume 96

**Supporting Material**

**Primary reactions of the LOV2 domain of phototropin studied with ultrafast mid-infrared spectroscopy and quantum chemistry**

Maxime T.A Alexandre, Tatiana Domratcheva, Cosimo Bonetti, Luuk J.G.W. van Wilderen, Rienk van Grondelle, Marie-Louise Groot, Klaas J. Hellingwerf and John T. M. Kennis

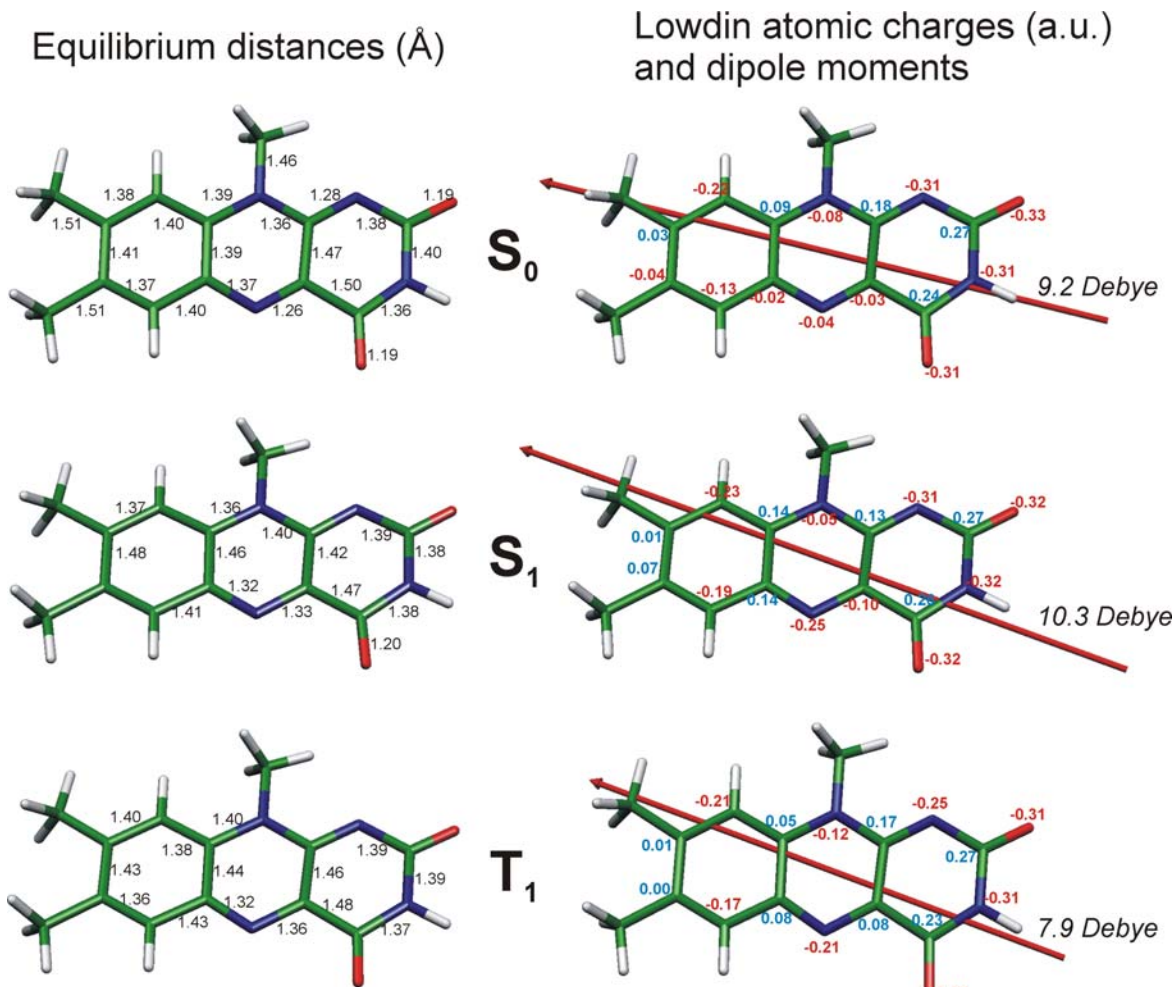

**Fig. S1.** Optimized structure, atomic charges, and dipole moment of lumiflavin in the ground state computed by HF/6-31G(d) and excited S<sub>1</sub> and T<sub>1</sub> states computed by CIS/6-31G(d). In the excited state structures only distances that are different from those in the ground state are indicated.

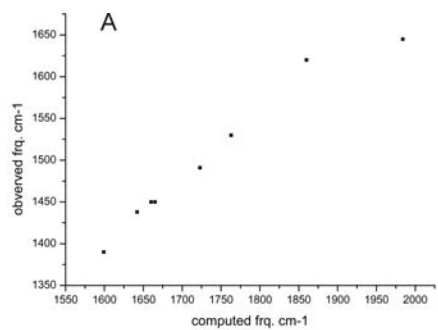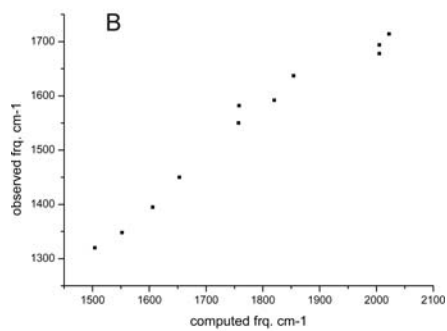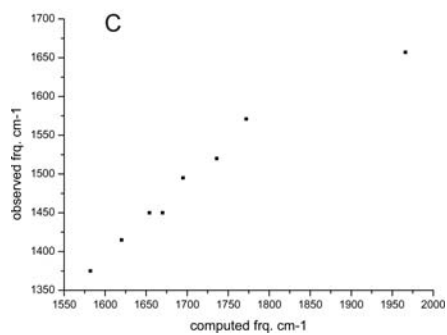

**Fig. S2.** Correspondence between observed and computed vibrational frequencies:  
A. ground state, HF/6-31(d)G method, Table S1;  
B. S<sub>1</sub> state, CIS/6-31(d)G method, Table S2;  
C. T<sub>1</sub> state, CIS/6-31G(d) method, Table S3.

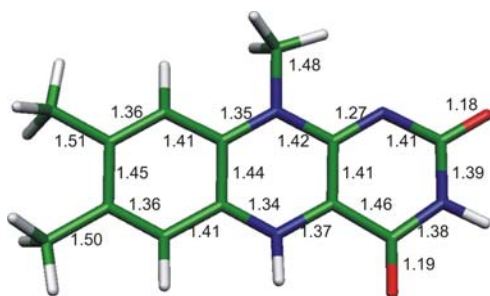

**Fig. S3.** Optimized structure of the N(5)-H protonated lumiflavin cation in the T<sub>1</sub> state computed by CIS/6-31G(d).

**Table S1.** Assignment of the experimental electronic ground state frequencies to the HF/6-31G(d) harmonic normal modes.

| Comput. freq.<br>(IR intensity) | Normal mode major components, $\nu$ – stretch, $\delta$ – bend                                                                   | Exptl. freq. |
|---------------------------------|----------------------------------------------------------------------------------------------------------------------------------|--------------|
| 2022 (8.5)                      | $\nu$ C(4)=O, C(2)=O                                                                                                             | 1714, 1694   |
| 2005 (25.9)                     | $\nu$ C(2)=O, C(4)=O                                                                                                             | 1678         |
| 1854 (14.4)                     | $\nu$ C6C7, C9C9a, C9aN10, N5C4a, C10aN1                                                                                         | 1637         |
| 1820 (7.5)                      | $\nu$ C6C7, C6C5a, C8C9, C9aN10, N5C4a                                                                                           | 1582         |
| 1758 (30.0)                     | $\nu$ C10aN1, N5C4a, C6C7                                                                                                        | 1550         |
| 1757 (4.9)                      | $\nu$ C7C8, C5aC9a, N10C10a, C10aN1, C5aN5, N5C4a                                                                                | 1550         |
| 1677 (0.1)                      | $\delta$ CH <sub>3</sub> (N10, C <sup>I</sup> , C <sup>II</sup> ); $\nu$ C7C8, C9C9a, C9aN10, C5aN5, N10C10a                     |              |
| 1660 (0.3)                      | $\delta$ CH <sub>3</sub> (N10)                                                                                                   |              |
| 1653 (1.9)                      | $\delta$ CH <sub>3</sub> (N10, C <sup>I</sup> ); $\nu$ C9aN10, C5aC9a, N5C4a, C4aC4                                              | (1450)       |
| 1642 (0.8)                      | $\delta$ CH <sub>3</sub> (C <sup>II</sup> ); $\nu$ C9C9a, C9aN10, C6C5a, C6C7                                                    |              |
| 1639 (0.4)                      | $\delta$ CH <sub>3</sub> (C <sup>I</sup> , C <sup>II</sup> )                                                                     |              |
| 1637 (0.1)                      | $\delta$ CH <sub>3</sub> (C <sup>I</sup> ); $\nu$ C6C5a, C9C9a, C7C8, C8C9, C5aN5                                                |              |
| 1624 (0.0)                      | $\delta$ CH <sub>3</sub> (C <sup>I</sup> , C <sup>II</sup> )                                                                     |              |
| 1606 (1.0)                      | $\delta$ CH <sub>3</sub> (N10); $\nu$ C8C9, C9aN10, N10C10a                                                                      | 1395         |
| 1591 (0.2)                      | $\delta$ CH <sub>3</sub> (N10, C <sup>I</sup> , C <sup>II</sup> ); $\nu$ C6C7, C6C5a, C8C9, C9C9a, C9aN10, N10C10a, C5aN5, N5C4a |              |
| 1576 (0.1)                      | $\delta$ CH <sub>3</sub> (C <sup>I</sup> , C <sup>II</sup> )                                                                     |              |
| 1572 (0.3)                      | $\delta$ CN3H; $\nu$ C4aC10a; C10aN1, C4aC4                                                                                      |              |
| 1563 (0.3)                      | $\delta$ CH <sub>3</sub> (C <sup>I</sup> , C <sup>II</sup> ); $\nu$ C4aC4, C5aN5, N10C10a, N1C2, C2N3, N3C4                      |              |
| 1552 (5.2)                      | $\delta$ CH <sub>3</sub> (N10), CN3H; $\nu$ C4aC10a, N10C(CH <sub>3</sub> ), C4aC4, C4N3, N3C2, C2N1                             | 1348         |
| 1504 (2.8)                      | $\nu$ C8C9, C9C9a, N10C(CH <sub>3</sub> ), N10C10a, C4N3, N3C2, C2N1                                                             | 1320         |

**Table S2.** Assignment of the S<sub>1</sub> experimental frequencies to the CIS/6-31G(d) harmonic normal modes.

| Comput. freq.<br>cm <sup>-1</sup> ,<br>(IR intensity) | Normal mode major components, $\nu$ – stretch, $\delta$ – bend                          | Exptl. freq.<br>cm <sup>-1</sup> |
|-------------------------------------------------------|-----------------------------------------------------------------------------------------|----------------------------------|
| 1988 (23.1)                                           | $\nu$ C(2)=O                                                                            | 1657                             |
| 1966 (14.9)                                           | $\nu$ C(4)=O                                                                            | 1657                             |
| 1772 (9.1)                                            | $\nu$ C8C9, C7C6, C6C5a, C9aN10, C10aN1                                                 | 1570                             |
| 1736 (3.5)                                            | $\nu$ C8C9, C7C6, C10aN1                                                                | 1520                             |
| 1695 (2.8)                                            | $\nu$ C6C7, C5aC9a, C9aN10, C4aC10a                                                     | 1495                             |
| 1670 (4.0)                                            | $\nu$ N5C5a, N5C4a, C9aN10                                                              | 1475                             |
| 1654 (3.4)                                            | $\nu$ C7C8, C6C5a, C9C9a, C9aN10, N5C5a                                                 | 1475                             |
| 1653 (0.3)                                            | $\delta$ CH <sub>3</sub> (N10)                                                          |                                  |
| 1652 (0.7)                                            | $\delta$ CH <sub>3</sub> (N10); $\nu$ N5C5a, N5C4a, N10C10a                             |                                  |
| 1634 (0.4)                                            | $\delta$ CH <sub>3</sub> (C <sup>I</sup> , C <sup>II</sup> )                            |                                  |
| 1622 (0.6)                                            | $\delta$ CH <sub>3</sub> (C <sup>I</sup> , C <sup>II</sup> ); $\nu$ N5C4a, C10aN1       |                                  |
| 1620 (1.4)                                            | $\delta$ CH <sub>3</sub> (C <sup>II</sup> ); $\nu$ C7C8, C9C9a, C6C5a, N5C4a            | 1415                             |
| 1618 (0.0)                                            | $\delta$ CH <sub>3</sub> (C <sup>I</sup> , C <sup>II</sup> )                            |                                  |
| 1606 (0.6)                                            | $\delta$ CH <sub>3</sub> (N10); $\nu$ C9aN10, N5C4a, C10aN1, C2N3                       |                                  |
| 1582 (1.3)                                            | $\delta$ CH <sub>3</sub> (N10);<br>$\nu$ C9aN10, C10aN1, N1C2, C2N3, N3C4, C4C4a, N5C4a | 1375                             |
| 1572 (0.7)                                            | $\nu$ C8C9, C7C6, C10aN1, C9aN10                                                        |                                  |
| 1567 (0.7)                                            | $\delta$ CN3H; $\nu$ C4aN5, C10aN1, C2N3                                                |                                  |
| 1559 (0.1)                                            | $\delta$ CH <sub>3</sub> (C <sup>I</sup> , C <sup>II</sup> )                            |                                  |
| 1529 (5.4)                                            | $\nu$ C4aC10a, N10C(CH <sub>3</sub> ), C7C6, C6C5a, C2N1, N3C4                          |                                  |
| 1519 (3.6)                                            | $\nu$ C9aN10, C5aN5, C10aN1, C4aC4, N3C4, N3C2                                          |                                  |

**Table S3.** Assignment of the  $T_1$  experimental frequencies to the CIS/6-31G(d) harmonic normal modes.

| Comput. freq.<br>$\text{cm}^{-1}$ ,<br>(IR intensity) | Normal mode major components, $\nu$ – stretch, $\delta$ – bend                                              | Exptl. freq.<br>$\text{cm}^{-1}$ |
|-------------------------------------------------------|-------------------------------------------------------------------------------------------------------------|----------------------------------|
| 2012 (16.2)                                           | $\nu$ C(2)=O                                                                                                | 1660, 1645                       |
| 1984 (12.5)                                           | $\nu$ C(4)=O                                                                                                | 1660, 1645                       |
| 1860 (1.3)                                            | $\nu$ C10aN1, C5aN5, N5C4a                                                                                  | 1620                             |
| 1763 (11.0)                                           | $\nu$ C7C6, C8C9, C9aN10, C10aN10, N5C4a, C10aN1                                                            | 1530                             |
| 1723 (29.0)                                           | $\nu$ C7C6, C8C9, C9aN10, C5aN5, C10aN1                                                                     | 1491                             |
| 1665 (1.7)                                            | $\delta$ CH <sub>3</sub> (N10); $\nu$ C8C9, N10C10a, C10aN1                                                 | 1475                             |
| 1660 (2.6)                                            | $\nu$ C7C8, C9C9a, C9aN10, C6C5a, C5aN5                                                                     | 1475                             |
| 1656 (0.2)                                            | $\delta$ CH <sub>3</sub> (N10)                                                                              |                                  |
| 1642 (1.7)                                            | $\nu$ C7C6, C5aC9a, C9aN10, C4aC10a, C10aN1                                                                 | 1438                             |
| 1637 (0.4)                                            | $\delta$ CH <sub>3</sub> (C <sup>I</sup> ,C <sup>II</sup> )                                                 |                                  |
| 1628 (0.1)                                            | $\delta$ CH <sub>3</sub> (C <sup>I</sup> ,C <sup>II</sup> ); $\nu$ C7C6, C8C7, C8C9, C9aN10, N5C4a, N10C10a |                                  |
| 1622 (0.0)                                            | $\delta$ CH <sub>3</sub> (C <sup>I</sup> ,C <sup>II</sup> );                                                |                                  |
| 1619 (1.8)                                            | $\delta$ CH <sub>3</sub> (N10,C <sup>I</sup> ,C <sup>II</sup> ); $\nu$ C7C8, C5aC9a, C9C9a, C6C5a, N10C10a  |                                  |
| 1599 (1.6)                                            | $\nu$ C8C9, C9C9a, C7C6, C6C5a, C9aN10, N10C10a, N5C4a                                                      | 1390                             |
| 1580 (1.0)                                            | $\nu$ C8C9, C9C9a, C7C6, C6C5a, C9aN10, N10C10a, C5aN5, N5C4a, C2N3, N3C4                                   | (1375)                           |
| 1573 (0.2)                                            | $\delta$ CH <sub>3</sub> (C <sup>I</sup> ,C <sup>II</sup> ); $\nu$ C6C5a, C9aN10, C5aN5, C2N3, C2N1         |                                  |
| 1570 (0.2)                                            | $\delta$ CN3H; $\nu$ C6C5a, C9aN10, C2N3, C5aN5                                                             |                                  |
| 1562 (0.0)                                            | $\delta$ CH <sub>3</sub> (C <sup>I</sup> ,C <sup>II</sup> ); $\nu$ N10C10a, C4C4a, C2N1, C4N3               |                                  |
| 1509 (10.6)                                           | $\nu$ C4C4a, C4N3, N3C2, C2N1, C4aC10a, C9aN10, C6C5a                                                       |                                  |
| 1470 (3.8)                                            | $\nu$ C9aN10, N10C(CH <sub>3</sub> ), C4aC10a, C5aN5, C4aC4                                                 |                                  |

**Table S4.** Computed CIS/6-31G(d) harmonic normal modes and frequencies of the N(5)-protonated lumiflavin cation in the first triplet state

| Comput. freq.<br>cm <sup>-1</sup> ,<br>(IR intensity) | Normal mode major components, $\nu$ – stretch, $\delta$ – bend                                                            |
|-------------------------------------------------------|---------------------------------------------------------------------------------------------------------------------------|
| 2130 (80.3)                                           | $\nu$ C5aN5, N5C4a, C4aC10a, C10aN1, C9aN10, C4aC4                                                                        |
| 2035 (42.8)                                           | $\nu$ C(2)=O, C5aN5, N5C4a                                                                                                |
| 1977 (19.0)                                           | $\nu$ C(4)=O, N5C4a, C10aN1                                                                                               |
| 1781 (5.4)                                            | $\nu$ C6C7, C8C9, C9C9a, C9aN10, C10aN1, C5aN5, N5C4a, C4aC4                                                              |
| 1747 (11.4)                                           | $\delta$ CN5H; $\nu$ C6C7, C7C8, C9aC5a, N10C10a, N5C4a, C10aN1                                                           |
| 1722 (4.5)                                            | $\nu$ C8C9, C9C9a, C10aN1, C5aN5, C4aC4, C4N3                                                                             |
| 1660 (2.5)                                            | $\delta$ CN5H, CH <sub>3</sub> (N10,C <sup>I</sup> ,C <sup>II</sup> ); $\nu$ C7C8, C9aN10, C5aN5, C4aC10a                 |
| 1654 (0.4)                                            | $\delta$ CH <sub>3</sub> (N10)                                                                                            |
| 1648 (0.6)                                            | $\delta$ CH <sub>3</sub> (N10,C <sup>I</sup> ,C <sup>II</sup> ); $\nu$ C7C8, C10aN10                                      |
| 1635 (0.3)                                            | $\delta$ CN5H, CH <sub>3</sub> (N10,C <sup>I</sup> ,C <sup>II</sup> ); $\nu$ C6C5a, C5aN5, C4aC10a, C9aN10                |
| 1628 (0.7)                                            | $\delta$ CH <sub>3</sub> (C <sup>I</sup> ,C <sup>II</sup> )                                                               |
| 1616 (1.8)                                            | $\delta$ CH <sub>3</sub> (C <sup>I</sup> ,C <sup>II</sup> ); $\nu$ C9C9a, C9aN10, C6C5a, C5aN5, N5C4a, N10C10a, C10aN1    |
| 1612 (1.2)                                            | $\delta$ CN5H, CH <sub>3</sub> (N10,C <sup>I</sup> ); $\nu$ C9aN10, N10C10a, C10aC4a, C5aN5                               |
| 1612 (0.0)                                            | $\delta$ CH <sub>3</sub> (C <sup>I</sup> ,C <sup>II</sup> )                                                               |
| 1602 (3.1)                                            | $\delta$ CH <sub>3</sub> (C <sup>I</sup> ,C <sup>II</sup> ), HCC; $\nu$ C7C8, C9C9a, C6C5a                                |
| 1573 (1.5)                                            | $\delta$ CN3H; $\nu$ C9aN10, N10C10a, C5aN5, N5C4a, C4aC4, C2N3                                                           |
| 1570 (0.0)                                            | $\delta$ CN3H, CH <sub>3</sub> (C <sup>I</sup> ,C <sup>II</sup> )                                                         |
| 1563 (2.1)                                            | $\delta$ CN3H, CH <sub>3</sub> (N10,C <sup>II</sup> ); $\nu$ C9aN10, N10C(CH <sub>3</sub> ), C10aN1, C4aC4, C4N3          |
| 1560 (1.8)                                            | $\delta$ CH <sub>3</sub> (N10,C <sup>I</sup> ,C <sup>II</sup> ); $\nu$ C9aN10, N10C(CH <sub>3</sub> ), C6C5a, C4aC4, C4N3 |
| 1544 (0.0)                                            | $\delta$ CN5H; $\nu$ C8C9, C7C6, C9aN10, C5aN5, C10aN1, C4aC4, C4C3                                                       |
